# Supplementary material for: MMP9 and TYROBP affect the survival of circulating tumor cells in clear cell renal cell carcinoma by adapting to tumor immune microenvironment
Source: PubMed Central journal article supplement (PMC10147606; doi:10.1038/s41598-023-34317-2), 2023-04-28
Supplement: 41598_2023_34317_MOESM3_ESM.pdf [file 41598_2023_34317_MOESM3_ESM.pdf]

A.MMP9

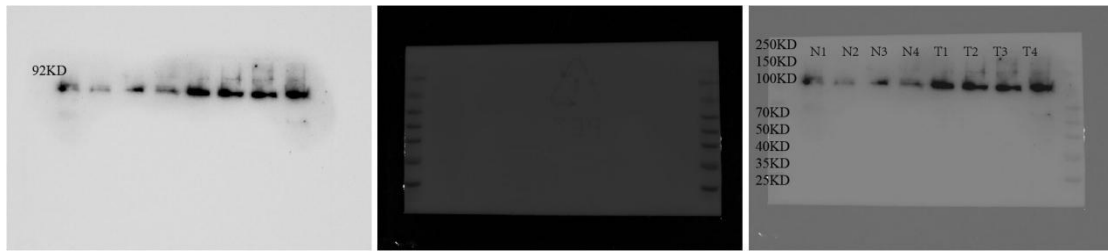

B.TYROBP

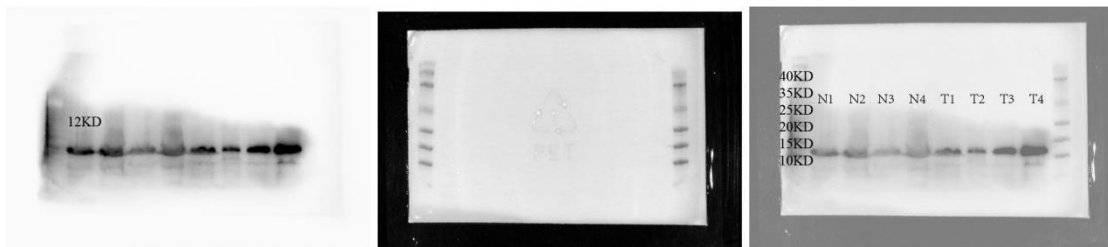

C.GAPDH

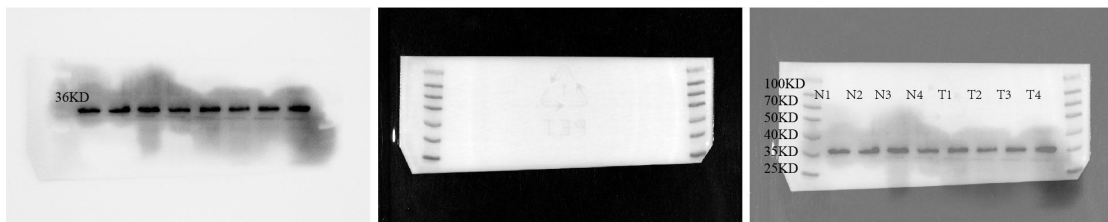

**Supplement figure 2.** Raw immunoblot data for images in Fig. 10D. (A).Immunoblot anti-MMP9 of ccRCC tissue samples. (B).Immunoblot anti-TYROBP of ccRCC tissue samples. (C).Immunoblot anti-GAPDH of ccRCC tissue samples.

A.MMP9

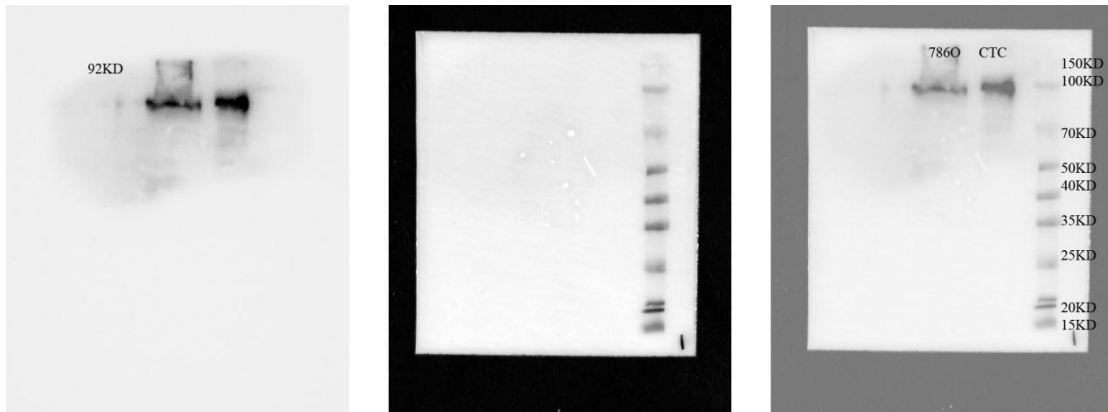

B.TYROBP

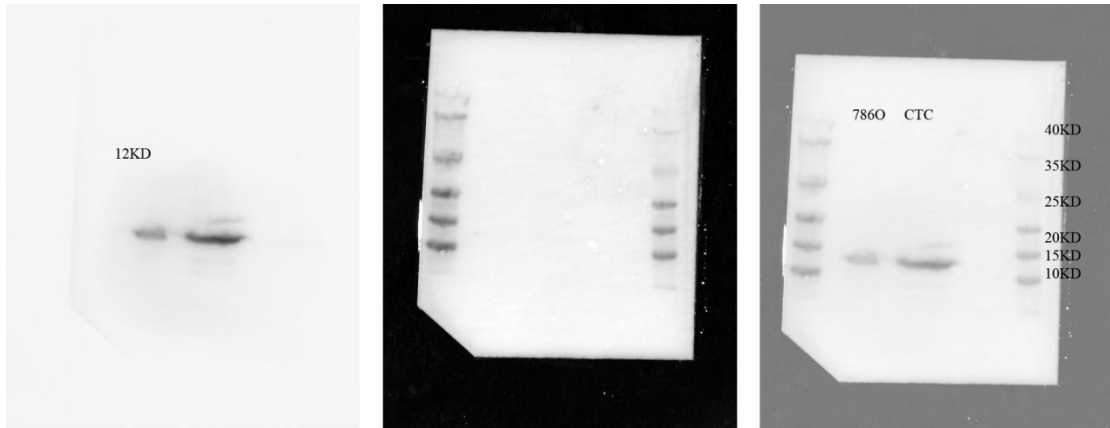

C.GAPDH

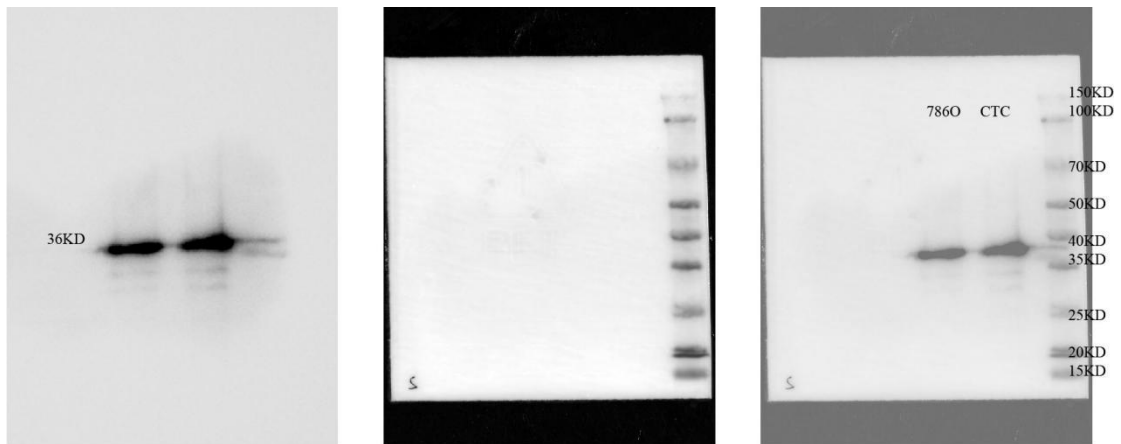

**Supplement figure 3.** Raw immunoblot data for images in Fig. 10E. (A).Immunoblot anti-MMP9 of CTC. (B).Immunoblot anti-TYROBP of CTC. (C).Immunoblot anti-GAPDH of CTC.
